## Point de pratique

# La prise en charge des nouveau-nés dont la mère a pris des opioïdes pendant la grossesse

Thierry Lacaze-Masmonteil, Pat O'Flaherty

Société canadienne de pédiatrie, comité d'étude du fœtus et du nouveau-né, Ottawa (Ontario)

Correspondance : Société canadienne de pédiatrie, 100–2305, boul. St. Laurent, Ottawa (Ontario) K1G 4J8

Courriel : [info@cps.ca](mailto:info@cps.ca); site Web : [www.cps.ca](http://www.cps.ca)

## Résumé

Chez les nouveau-nés, l'incidence de sevrage aux opioïdes a augmenté rapidement dans bien des pays depuis dix ans, y compris au Canada. Ce phénomène est très inquiétant pour la santé et le développement précoce du cerveau. La plus grande exposition prénatale aux opioïdes reflète l'utilisation croissante d'opioïdes sur ordonnance, la consommation d'opioïdes illégaux et le recours aux thérapies de substitution aux opioïdes. Les nouveau-nés sont à haut risque de présenter des symptômes d'abstinence ou de sevrage susceptibles d'exiger une évaluation et un traitement. Le présent point de pratique traite expressément des effets du sevrage aux opioïdes et des stratégies de prise en charge des nouveau-nés d'une mère dépendante aux opioïdes.

**Mots-clés :** *Discharge planning; Management; NAS; NPI; Treatment strategies*

## HISTORIQUE

En 2016–2017, l'Institut canadien d'information sur la santé a signalé qu'environ 0,51 % de tous les nouveau-nés du Canada (soit environ 1 850 par année, à l'exception du Québec) présente un syndrome d'abstinence néonatale (SAN). Un fort pourcentage de ces cas est attribuable au sevrage aux opioïdes (1). Ces nouveau-nés séjournent en moyenne 15 jours dans des établissements de soins aigus. Selon des rapports récents, le nombre de nouveau-nés qui doivent demeurer en observation à cause de symptômes de sevrage augmente chaque année et est généralement sous-déclaré (2). Les coûts d'hospitalisation démontrent le fardeau important que représente ce problème pour la santé des mères, des nouveau-nés et des familles, ainsi que pour les unités hospitalières, les dispensateurs de soins et les ressources communautaires (3).

Que les opioïdes soient prescrits ou consommés illégalement, leur consommation par les femmes enceintes peut avoir des conséquences négatives sur la grossesse et le nouveau-né, y compris la prématurité, le petit poids à la naissance, l'augmentation du risque d'avortement spontané, la mort subite du nourrisson et les anomalies neurocomportementales du nourrisson (4).

La morphine et la codéine sont des composants naturels. L'héroïne, l'oxycodone, l'hydrocodone, l'hydromorphone et la buprénorphine sont semi-synthétiques, alors que le fentanyl, la méthadone, la norméthadone, le tramadol et la mépéridine sont synthétiques (5). Les complications à court terme, et surtout le SAN, sont les principaux effets de la dépendance de la mère et de l'exposition prénatale du fœtus aux opioïdes. Le SAN désigne une série de symptômes de sevrage aux médicaments qui peuvent toucher le système nerveux central et les appareils gastro-intestinal et respiratoire du nouveau-né (6). Il est difficile de prédire les effets à long terme de l'exposition prénatale aux opioïdes, car cette exposition s'ajoute aux variables à la fois multiples et interdépendantes des facteurs de risque de la mère et du nouveau-né, qui sont connus pour nuire au développement au sein de cette cohorte (7,8).

Il faut conseiller aux femmes enceintes dépendantes aux opioïdes de poursuivre ou d'entreprendre un traitement d'entretien aux opioïdes (9). La méthadone leur est souvent recommandée (10), et certaines études proposent la buprénorphine comme solution de rechange (11). Selon les publications, le traitement de substitution aux opioïdes pendant la grossesse peut limiter la consommation d'autres opioïdes et de drogues et améliorer les

soins prénatals, y compris l'accès à l'information, les conseils thérapeutiques et les services de soutien communautaires (12,13). Il est recommandé d'obtenir l'histoire détaillée de consommation de médicaments et de substances illicites et une histoire sociale ciblée. Parmi les risques connexes pour la santé, soulignons les infections (p. ex., l'hépatite B, l'hépatite C, la syphilis et le VIH), l'alimentation insuffisante de la mère ou l'accès insuffisant aux soins anténatals, de même que des facteurs de risque sociaux. Il faut effectuer les tests de dépistage, poser les diagnostics et procéder à la prise en charge nécessaire.

## LA PRÉSENTATION CLINIQUE

La présentation des symptômes de sevrage varie selon le type d'opioïdes utilisé par la mère, la fréquence de consommation, la dose prise, le moment de la dernière exposition, l'âge gestationnel, le métabolisme de la mère et sa consommation d'autres substances. De 50 % à 75 % des nouveau-nés d'une mère qui prend des opioïdes devront être traités à cause de symptômes de sevrage aux opioïdes (14). En général, ces symptômes (figure 1) se manifestent peu après la naissance, la majorité se déclarant de 48 à 72 heures après l'accouchement. Certains rapports semblent indiquer une présentation plus tardive des symptômes, de cinq à sept jours après l'accouchement, après l'exposition à la méthadone ou à la buprénorphine (15,16). Les premiers symptômes aigus peuvent subsister plusieurs semaines (de dix à 30 jours), alors que les symptômes plus légers, tels que l'irritabilité, les

troubles du sommeil et les difficultés d'alimentation, peuvent persister de quatre à six mois (17). On décrit les nouveau-nés prématurés comme moins à risque de sevrage, et leurs symptômes de SAN ne sont peut-être pas aussi apparents que chez leurs homologues à terme (18,19). Cette différence peut s'expliquer par une période d'exposition plus courte *in utero*, une transmission placentaire réduite, l'incapacité pour les reins et le foie immatures d'excréter complètement les drogues, les très faibles réserves de graisse qui limitent le dépôt et l'activité des opioïdes, de même que la capacité limitée qu'a le cerveau immature d'exprimer les symptômes classiques de SAN (19).

D'autres affections néonatales, telles que l'hypoglycémie, l'hypocalcémie, les lésions du système nerveux central, l'hyperthyroïdie, le sepsis bactérien ou d'autres infections, qui peuvent se manifester par des symptômes similaires, devraient faire partie du diagnostic différentiel.

## L'ÉVALUATION

Chez tous les nouveau-nés exposés aux opioïdes, un système d'évaluation à l'aide d'un score permet de mesurer la gravité des symptômes de sevrage et de déterminer si une surveillance, des soins infirmiers et un traitement médical ou pharmacologique accrus seront nécessaires (20). Le score de Finnegan est l'échelle la plus utilisée pour évaluer si un nouveau-né souffre de sevrage aux opioïdes (figure 1) (21). En général, on obtient un score initial dans l'heure ou les deux heures suivant l'accouchement, puis on le reprend toutes les trois à quatre heures, conjointement

MODÈLE DE SYSTÈME DE MESURE DU SCORE D'ABSTINENCE NÉONATALE

| SYSTÈME                                           | SIGNES ET SYMPTÔMES                                | SCORE | AVANT-MIDI |  |  |  |  |  | APRÈS-MIDI |  |  |  |  | COMMENTAIRES    |
|---------------------------------------------------|----------------------------------------------------|-------|------------|--|--|--|--|--|------------|--|--|--|--|-----------------|
| TROUBLES DU SYSTÈME NERVEUX CENTRAL               | Cri aigu (ou autre) excessif, < 5 minutes          | 2     |            |  |  |  |  |  |            |  |  |  |  | Poids quotidien |
|                                                   | Cri aigu (ou autre) continu, > 5 minutes           | 3     |            |  |  |  |  |  |            |  |  |  |  |                 |
|                                                   | Sommeil de <1 heure après le boire                 | 3     |            |  |  |  |  |  |            |  |  |  |  |                 |
|                                                   | Sommeil de <2 heures après le boire                | 2     |            |  |  |  |  |  |            |  |  |  |  |                 |
|                                                   | Sommeil de <3 heures après le boire                | 1     |            |  |  |  |  |  |            |  |  |  |  |                 |
|                                                   | Réflexe de Moro hyperactif                         | 2     |            |  |  |  |  |  |            |  |  |  |  |                 |
|                                                   | Réflexe de Moro très hyperactif                    | 3     |            |  |  |  |  |  |            |  |  |  |  |                 |
|                                                   | Trémulations légères provoquées                    | 1     |            |  |  |  |  |  |            |  |  |  |  |                 |
|                                                   | Trémulations modérées à graves provoquées          | 2     |            |  |  |  |  |  |            |  |  |  |  |                 |
|                                                   | Trémulations légères non provoquées                | 3     |            |  |  |  |  |  |            |  |  |  |  |                 |
|                                                   | Trémulations modérées à graves non provoquées      | 4     |            |  |  |  |  |  |            |  |  |  |  |                 |
|                                                   | Hypertonie                                         | 2     |            |  |  |  |  |  |            |  |  |  |  |                 |
|                                                   | Excoriations (région précise)                      | 1     |            |  |  |  |  |  |            |  |  |  |  |                 |
|                                                   | Mouvements myocloniques                            | 3     |            |  |  |  |  |  |            |  |  |  |  |                 |
| Convulsions généralisées                          | 5                                                  |       |            |  |  |  |  |  |            |  |  |  |  |                 |
| TROUBLES MÉTABOLIQUES, VASOMOTEURS, RESPIRATOIRES | Transpiration                                      | 1     |            |  |  |  |  |  |            |  |  |  |  |                 |
|                                                   | Fièvre de 38 °C à 38,3 °C                          | 1     |            |  |  |  |  |  |            |  |  |  |  |                 |
|                                                   | Fièvre >38,3 °C                                    | 2     |            |  |  |  |  |  |            |  |  |  |  |                 |
|                                                   | Bâillements fréquents (>3 à 4 fois par intervalle) | 1     |            |  |  |  |  |  |            |  |  |  |  |                 |
|                                                   | Marbrures                                          | 1     |            |  |  |  |  |  |            |  |  |  |  |                 |
|                                                   | Encombrement nasal                                 | 1     |            |  |  |  |  |  |            |  |  |  |  |                 |
|                                                   | Éternuements (>3 à 4 fois par intervalle)          | 1     |            |  |  |  |  |  |            |  |  |  |  |                 |
|                                                   | Battement des ailes du nez                         | 2     |            |  |  |  |  |  |            |  |  |  |  |                 |
| TROUBLES GASTRO-INTESTINAUX                       | Fréquence respiratoire >60/min                     | 1     |            |  |  |  |  |  |            |  |  |  |  |                 |
|                                                   | Fréquence respiratoire >60/min avec tirage         | 2     |            |  |  |  |  |  |            |  |  |  |  |                 |
| TROUBLES GASTRO-INTESTINAUX                       | Succion excessive                                  | 1     |            |  |  |  |  |  |            |  |  |  |  |                 |
|                                                   | Difficultés d'alimentation                         | 2     |            |  |  |  |  |  |            |  |  |  |  |                 |
|                                                   | Régurgitation                                      | 2     |            |  |  |  |  |  |            |  |  |  |  |                 |
|                                                   | Vomissement en jet                                 | 3     |            |  |  |  |  |  |            |  |  |  |  |                 |
|                                                   | Selles molles                                      | 2     |            |  |  |  |  |  |            |  |  |  |  |                 |
| Selles aqueuses                                   | 3                                                  |       |            |  |  |  |  |  |            |  |  |  |  |                 |
| SCORE TOTAL                                       |                                                    |       |            |  |  |  |  |  |            |  |  |  |  |                 |
| INITIALES DE L'ÉVALUATEUR                         |                                                    |       |            |  |  |  |  |  |            |  |  |  |  |                 |

Figure 1. Score modifié de Finnegan. Traduit des références 15,20,21

avec d'autres évaluations infirmières. Selon la plupart des lignes directrices, le score est mesuré pendant au moins 72 heures et jusqu'à 120 heures lorsque le nouveau-né a été exposé *in utero* à un opioïde à longue durée d'action, comme la méthadone ou la buprénorphine (19). L'échelle peut également être utilisée pour évaluer la résolution des symptômes après le début du traitement. Il est nécessaire d'établir un score précis et uniforme des symptômes pour s'assurer que le nouveau-né reçoive des soins appropriés (22). Il existe diverses vidéos didactiques et approches « former le formateur » pour enseigner au personnel à bien mesurer le score (23). La priorité consiste à créer un processus standardisé pour dépister, prendre en charge et évaluer les nouveau-nés ayant un SAN, puis à leur accorder leur congé au moment sécuritaire et approprié.

## LA PRISE EN CHARGE

La réussite du traitement de soutien des nouveau-nés exposés aux opioïdes pendant la grossesse dépend de plusieurs facteurs, y compris l'administration des médicaments appropriés, un horaire d'administration adéquat, l'utilisation d'un outil précis pour mesurer et évaluer la gravité des symptômes, la création d'un environnement physique adapté et la présence d'une équipe soignante expérimentée et compétente. Il est essentiel de faire participer les membres de l'équipe interprofessionnelle (spécialisée en soins infirmiers, en médecine néonatale, en travail social, en pharmacie, en nutrition et en ressources communautaires) pour que ces nouveau-nés vulnérables profitent d'une prise en charge et d'un congé sans incident (15). Les objectifs thérapeutiques consistent à prévenir les complications associées au SAN et à rétablir les activités normales du nouveau-né, comme le sommeil, l'alimentation suffisante, la prise de poids et l'adaptation à l'environnement.

Outre l'autodéclaration de la mère, certains praticiens procèdent à des examens toxicologiques de l'urine ou du méconium des nouveau-nés s'ils soupçonnent que la mère a consommé des drogues pendant la grossesse. Ces examens peuvent contribuer à déterminer les substances consommées et à sélectionner le traitement pharmacologique approprié, s'il y a lieu (16). Cependant, la validité et la fiabilité des tests toxicologiques demeurent controversées (24). Il est également important d'obtenir le consentement de la mère pour effectuer les tests, de déterminer qui aura accès aux résultats et de tenir compte d'autres considérations juridiques dans le processus décisionnel visant la tenue ou l'envoi de tests toxicologiques (25). Selon les lignes directrices nationales en réanimation néonatale, il faut éviter la naloxone pendant la réanimation du nouveau-né dont la mère est dépendante aux opioïdes, car ce produit s'associe à des convulsions dans cette population (26). D'après les données probantes, en l'absence d'autres facteurs de risque, les compétences habituelles des professionnels de la santé suffisent lors de l'accouchement.

Il est bien connu que l'attachement peut être entravé par la séparation du nouveau-né et de sa mère. De récentes publications appuient les pratiques visant à maintenir les mères dépendantes aux opioïdes avec leur nouveau-né, comme la cohabitation. Ces pratiques comportent d'autres avantages, telles qu'un moins grand nombre d'admissions à l'unité de soins intensifs néonataux (USIN), un plus fort taux d'allaitement, une moins grande utilisation de la pharmacothérapie et des séjours hospitaliers de plus courte durée (27-30). Un modèle de soins en cohabitation, plutôt que l'admission à l'USIN, peut être envisagé pour les dyades mère-nouveau-né vulnérables à des symptômes de SAN lorsque le nouveau-né est à terme ou presque à terme, que son état médical est stable et que des ressources sont en place pour soutenir à la fois la famille et les professionnels de la santé.

## Les interventions non pharmacologiques

Le traitement initial du sevrage néonatal doit d'abord en être un de soutien, car les interventions médicales peuvent prolonger l'hospitalisation, perturber le lien d'attachement entre la mère et son nouveau-né et soumettre celui-ci à des médicaments dont il n'a peut-être pas besoin. Il est démontré que les interventions non pharmacologiques réduisent les effets du sevrage et doivent être adoptées le plus vite possible après l'accouchement (2). Parmi les exemples d'interventions de soutien, soulignons le contact peau contre peau, l'emballage sécuritaire, les réveils en douceur, un environnement calme, une stimulation minimale, un éclairage plus faible, un positionnement développemental, la musique ou la massothérapie (31).

L'allaitement est à encourager, car il peut retarder l'apparition des symptômes de sevrage et en réduire la gravité, tout en limitant les traitements pharmacologiques (32). Les mères séronégatives pour le VIH dont l'état est stable et qui suivent un traitement d'entretien à la méthadone ou à la buprénorphine pour contrer la dépendance aux opioïdes devraient être encouragées à allaiter (9). L'allaitement fournit une nutrition optimale, favorise l'attachement entre la mère et son nouveau-né et contribue aux compétences parentales. Les mères qui présentent une dépendance et qui désirent allaiter pourraient avoir besoin d'un soutien supplémentaire, car elles sont moins susceptibles de bien amorcer l'allaitement et plus susceptibles d'abandonner rapidement (33).

Les nouveau-nés ayant un SAN peuvent présenter une perturbation des comportements alimentaires, tels qu'une succion non nutritive excessive, une alimentation insatisfaisante, des régurgitations et des diarrhées (34). Une étude préliminaire (35) a révélé que les nouveau-nés exposés aux opioïdes avaient plus de difficultés d'alimentation (rejet du mamelon, dégoûlineur du lait, hoquet, régurgitation et toux) que ceux qui n'y avaient pas été exposés. Des études plus récentes ont confirmé ces observations et décrit les problèmes que rencontrent les personnes qui s'occupent

du nouveau-né en sevrage au moment des boires (36). Il est proposé de donner des suppléments hypercaloriques de lait aux nouveau-nés qui prennent trop peu de poids afin d'accroître leur apport calorique ou leur apport hydrique total (37).

### Les interventions pharmacologiques

Un traitement pharmacologique est indiqué chez les nouveau-nés dont les signes de sevrage s'aggravent constamment ou dont les scores de SAN augmentent parallèlement malgré des mesures de soutien pour réduire et traiter leurs symptômes. Il se peut que les nouveau-nés qui ont besoin de se faire administrer des médicaments doivent être admis à la pouponnière de soins spéciaux ou à l'USIN pour être soumis à un monitoring cardiorespiratoire et demeurer en observation au début du traitement, surtout si leur état n'est pas stable. Le nouveau-né dont l'état s'est stabilisé peut reprendre la cohabitation avec sa mère si l'évaluation clinique, l'information au parent et la surveillance du sevrage des médicaments se poursuivent, que des mesures de soutien de l'attachement entre le nouveau-né et sa mère sont prévues et qu'un plan de congé complet peut être amorcé (29). Il est démontré que la cohabitation d'un nouveau-né avec sa mère qui suit un programme d'entretien à la méthadone et qui allaite réduit le recours aux interventions pharmacologiques (30).

Plusieurs agents pharmacologiques sont utilisés pour atténuer les symptômes du sevrage néonatal aux opioïdes (tableau 1). Toutefois, peu d'études ont porté sur leur efficacité. L'*American Academy of Paediatrics* recommande d'apparier le médicament retenu avec le type d'agent responsable du sevrage (19). La morphine et la méthadone demeurent les médicaments les plus utilisés en première ligne, mais les preuves sont insuffisantes pour déterminer lequel est supérieur à l'autre (38). Par rapport à la morphine par voie orale, il a récemment été démontré que la buprénorphine sublinguale réduit de 42 % le séjour hospitalier chez les nouveau-nés symptomatiques d'une mère qui prend de la méthadone (39). L'ajout de phénobarbital ou de clonidine pour traiter le sevrage aux opioïdes a fait l'objet d'études et été intégré à certaines lignes directrices (40,41). Les lignes directrices publiées contiennent de l'information sur les doses initiales, la majoration des doses, l'amorce de traitements supplémentaires et le sevrage, afin de favoriser une approche uniforme de la prise en charge (42).

### LES CONSIDÉRATIONS LIÉES AU CONGÉ

La durée de l'hospitalisation varie selon l'exposition prénatale aux médicaments ou aux drogues, la gravité du sevrage, les symptômes, le traitement et les facteurs sociaux (42). Il faut maintenir les nouveau-nés en observation pendant au moins 72 heures. S'ils n'atteignent pas le seuil de traitement au cours de cette période, ils peuvent obtenir leur congé (43). Pour

bien réussir la transition à la maison, il faut qu'une équipe interprofessionnelle assure la continuité des soins et planifie la suite des choses une fois que le nouveau-né respecte les critères de congé.

Dans la planification individualisée du congé, une orientation appropriée s'impose. Ainsi, le nouveau-né doit être dirigé vers un dispensateur de soins primaires qui connaît le traitement pharmacologique pour sevrer les opioïdes, les ressources nutritionnelles, les ressources de soutien familial et l'évaluation neurodéveloppementale du nouveau-né. Il est essentiel de parler du plan de congé et du suivi avec la famille biologique du nouveau-né (ou avec la famille d'accueil, s'il y a lieu) et avec le professionnel de la santé de première ligne. Dans certaines situations où le suivi médical et social peut être offert, le nouveau-né peut recevoir son congé à domicile tout en demeurant sous traitement pharmacologique (44,45). Quelques études auprès d'un groupe sélectionné de nouveau-nés démontrent que leur prise en charge peut être sécuritaire en milieu ambulatoire, sans augmenter la durée du traitement (46). Les avantages de la désintoxication à domicile incluent la diminution du séjour à l'hôpital et des frais connexes pour le système de santé, la promotion de l'attachement entre le nouveau-né et la personne qui s'occupe de lui et l'augmentation du taux d'allaitement (47). Bien sûr, il faut soupeser ces avantages par rapport aux risques. Avant le congé, le nouveau-né doit démontrer qu'il tolère la dégression des produits pharmacologiques, présenter des scores de sevrage constamment inférieurs à 8 et être doté d'un plan de sevrage clair et bien étayé que respecteront son professionnel de la santé et sa famille. D'autres ressources en milieu communautaire sont à envisager, y compris les programmes de traitement des dépendances aux substances psychoactives pour les mères, les services de santé publique et de protection de l'enfance et de la jeunesse, les intervenants en soutien communautaire, les programmes de développement du nourrisson et les groupes de soutien parental. De plus, les familles et les tuteurs doivent démontrer qu'ils peuvent offrir un milieu familial favorable et sécuritaire (48).

### Sommaire

Il faut aviser les mères dépendantes aux opioïdes que leur nouveau-né qui a été exposé à des opioïdes naturels, semi-synthétiques ou synthétiques pendant la grossesse devra être maintenu en observation après l'accouchement. En effet, il faudra surveiller s'il présente des signes et symptômes de sevrage néonatal. Une consultation anténatale en périnatalogie, en pédiatrie ou en néonatalogie est préconisée.

Tous les nouveau-nés à risque de sevrage néonatal aux opioïdes doivent être évalués au moyen d'un outil validé pour calculer le score de sevrage néonatal.

Les renseignements et les lignes directrices destinés aux professionnels de la santé sur la prise en charge des nouveau-nés

**Tableau 1.** Les médicaments pour traiter le syndrome d'abstinence néonatale

| Médicament    | Mécanisme d'action                                                                             | Dose                                                                                                                                                                                                                                                                                                                                                                                                                                                                                                                                                                                                                                                                                                                                                                                              | Commentaires                                                                                                                                                                                                                                                             |
|---------------|------------------------------------------------------------------------------------------------|---------------------------------------------------------------------------------------------------------------------------------------------------------------------------------------------------------------------------------------------------------------------------------------------------------------------------------------------------------------------------------------------------------------------------------------------------------------------------------------------------------------------------------------------------------------------------------------------------------------------------------------------------------------------------------------------------------------------------------------------------------------------------------------------------|--------------------------------------------------------------------------------------------------------------------------------------------------------------------------------------------------------------------------------------------------------------------------|
| Morphine      | Agoniste naturel des récepteurs mu                                                             | Si le score est $\geq 8$ lors de 3 évaluations consécutives (ou $\geq 12$ lors de 2 évaluations consécutives), commencer par 0,32 mg/kg/jour par voie orale, divisée toutes les 4 à 6 heures.<br>Si le score demeure $\geq 8$ lors de 3 évaluations consécutives (ou $\geq 12$ lors de 2 évaluations consécutives), augmenter de 0,16 mg/kg/jour toutes les 4 à 6 heures, jusqu'à concurrence de 1,0 mg/kg/jour.<br>La plupart des protocoles de dégression réduisent la dose de 10 % par rapport à la dose quotidienne totale toutes les 48 à 72 heures, en fonction des scores de syndrome d'abstinence néonatale.<br><a href="http://pcmch.on.ca/ClinicalPracticeGuidelines/NeonatalAbstinenceSyndrome.aspx">http://pcmch.on.ca/ClinicalPracticeGuidelines/NeonatalAbstinenceSyndrome.aspx</a> | Généralement utilisée en première ligne au Canada.<br>Ne contient pas d'alcool.<br>Courte demi-vie (9 h).<br><br>Lorsque les scores de syndrome d'abstinence néonatale sont stables ( $< 8$ ) pendant 48 à 72 heures, envisager le sevrage.                              |
| Méthadone     | Agoniste synthétique entier des récepteurs mu; antagoniste des récepteurs N-méthyl-D-aspartate | 0,05 à 0,1 mg/kg/dose par voie orale toutes les 6 à 12 heures.<br>Augmenter de 0,05 mg/kg toutes les 48 heures.<br>Dose maximale de 1 mg/kg/jour.                                                                                                                                                                                                                                                                                                                                                                                                                                                                                                                                                                                                                                                 | Longue demi-vie (26 heures).<br>Utilisée dans de nombreux pays en première ligne (au lieu de la morphine) lorsque la mère prend de la méthadone. Offerte au Canada, mais exige une autorisation de délivrance ou de prescription particulière.<br>Contient 8 % d'alcool. |
| Phénobarbital | Agoniste des récepteurs de l'acide gamma amino-butyrrique                                      | Peut être utilisé en plus de la morphine, surtout en présence d'une polytoxicomanie.<br>Dose de charge : 10 mg/kg par voie orale toutes les 12 heures, pour un total de 3 doses.<br>Dose d'entretien : 5 mg/kg/jour par voie orale.<br>Sevrer de 10 % à 20 % tous les jours ou tous les deux jours une fois les symptômes contrôlés.                                                                                                                                                                                                                                                                                                                                                                                                                                                              | Longue demi-vie (45 à 100 heures).<br>Exige un monitoring des taux sanguins.<br>Peut aggraver les symptômes gastro-intestinaux.<br>Effet sédatif.<br>Contient 15 % d'alcool.                                                                                             |
| Clonidine     | Agoniste des récepteurs alpha-2 adrénergiques                                                  | Autre possibilité thérapeutique en combinaison avec la morphine.<br>Particulièrement efficace en présence de symptômes autonomes de syndrome d'abstinence néonatale.<br>Commencer par 0,5 mcg/kg par voie orale, divisée toutes les 4 à 6 heures.<br>Sevrer de 25 % de la dose quotidienne totale tous les deux jours (toutes les 4 à 6 heures pendant 48 heures, puis toutes les 8 heures pendant 48 heures, puis toutes les 12 heures pendant 48 heures, puis au coucher, puis arrêt de la médication).                                                                                                                                                                                                                                                                                         | Possibilité d'utiliser une préparation sans alcool.<br>Longue demi-vie (44 à 72 heures).<br>L'arrêt abrupt peut provoquer une augmentation rapide de la tension artérielle et de la fréquence cardiaque. Un sevrage graduel est donc recommandé.                         |
| Buprénorphine | Agoniste semi-synthétique partiel des récepteurs mu, antagoniste des récepteurs kappa          | 4 à 5 mcg/kg/dose par voie sublinguale toutes les 8 heures.<br>Dose maximale de 60 mcg/kg/jour.                                                                                                                                                                                                                                                                                                                                                                                                                                                                                                                                                                                                                                                                                                   | Demi-vie (24 à 60 heures).<br>Administration sublinguale d'une dilution de solution de buprénorphine dans l'éthanol et le sucrose.<br>Contient 30 % d'alcool.                                                                                                            |

Données traduites de la référence 19

d'une mère dépendante aux opioïdes doivent insister sur la continuité des soins. Il est également essentiel de prévoir des stratégies pour que la mère et le nouveau-né restent ensemble et pour favoriser l'allaitement. Des interventions non pharmacologiques, telles que le contact peau contre peau, le positionnement développemental, les mesures de confort et la restriction des stimulus environnementaux, une alimentation suffisante et un traitement pharmacologique, si la situation le justifie, font partie des éléments clés d'un plan complet.

Il est capital de prévoir un plan de congé efficace et bien coordonné, qui fait appel à une équipe soignante interprofessionnelle et à un plan de sevrage détaillé, pour assurer une transition harmonieuse entre l'hôpital et le milieu communautaire, de même que pour maintenir la continuité des soins.

## Remerciements

Le comité de la pédiatrie communautaire, le comité de la pharmacologie et des substances dangereuses et le comité de la santé des Premières nations, des Inuits et des Métis de la Société canadienne de pédiatrie, de même que des représentants de La Société des obstétriciens et gynécologues du Canada, ont révisé le présent document de principes.

## Références

- Turner SD, Gomes T, Camache X et coll. Neonatal opioid withdrawal and antenatal opioid prescribing. *CMAJ Open Research* 2015;3(1):E55-61.
- Dow K, Ordean A, Murphy-Oikonen J et coll.; Neonatal Abstinence Syndrome Work Group. Neonatal abstinence syndrome clinical practice guidelines for Ontario. *J Popul Ther Clin Pharmacol* 2012;19(3):e488-506.
- Patrick SW, Schumacher RE, Benneyworth BD, Krans EE, McAllister JM, Davis MM. Neonatal abstinence syndrome and associated health care expenditures: United States, 2000-2009. *JAMA* 2012;307(18):1934-40.
- Vucinovic M, Roje D, Vucinovic Z, Capkun V, Bucat M, Banovic I. Maternal and neonatal effects of substance abuse during pregnancy: Our ten-year experience. *Yonsei Med J* 2008;49(5):705-13.
- Opiate Addiction and Treatment Resource. [www.opiateaddictionresource.com/opiates/types\\_of\\_opioids](http://www.opiateaddictionresource.com/opiates/types_of_opioids) (consulté le 22 août 2017)
- Finnegan LP. Toxicomanie au Canada : Consommation de drogues licites et illicites pendant la grossesse : Répercussions sur la santé maternelle, néonatale et infantile. Ottawa, Ont. : Centre canadien de lutte contre la toxicomanie, 2013. [www.ccsa.ca/Resource\\_Library/CCSA-Drug-Use-During-Pregnancy-Report-2013-fr.pdf](http://www.ccsa.ca/Resource_Library/CCSA-Drug-Use-During-Pregnancy-Report-2013-fr.pdf) (consulté le 3 août 2017)
- Logan BA, Brown MS, Hayes MJ. Neonatal abstinence syndrome: Treatment and pediatric outcomes. *Clin Obstet Gynecol* 2013;56(1):186-92.
- Behnke M, Smith VC; Committee on Substance Abuse; Committee on Fetus and Newborn. Prenatal substance abuse: Short- and long-term effects on the exposed fetus. *Pediatrics* 2013;131(3):e1009-24.
- OMS. Guidelines for the Identification and Management of Substance Use and Substance Use Disorders in Pregnancy. Genève, Suisse: OMS, 2014. [http://apps.who.int/iris/bitstream/10665/107130/1/9789241548731\\_eng.pdf](http://apps.who.int/iris/bitstream/10665/107130/1/9789241548731_eng.pdf) (consulté le 3 août 2017)
- Wong S, Ordean A, Kahan M; comité de médecine fœto-maternelle; comité consultatif des médecins de famille; comité médico-juridique; analystes ad hoc; collaboratrices spéciales. Consommation de substances psychoactives pendant la grossesse. Directives cliniques de la SOGC. *J Obstet Gynaecol Can* 2011;33(4):385-405. [www.jogc.com/article/S1701-2163\(16\)34856-3/pdf](http://www.jogc.com/article/S1701-2163(16)34856-3/pdf) (consulté le 3 août 2017)
- Jones HE, Finnegan LP, Kaltenbach K. Methadone and buprenorphine for the management of opioid dependence in pregnancy. *Drugs* 2012;72(6):747-57.
- Ordean A, Kahan M, Graves L, Abrahams R, Boyajian T. Integrated care for pregnant women on methadone maintenance therapy: Canadian primary care cohort study. *Can Fam Physician* 2013;59(10):e462-9.
- Burns L, Mattick RP, Lim K, Wallace C. Methadone in pregnancy: Treatment retention and neonatal outcomes. *Addiction* 2007;102(2):264-70.
- Casper T, Arbour M. Evidence-based nurse-driven interventions for the care of newborns with neonatal abstinence syndrome. *Adv Neonatal Care* 2014;14(6):376-80.
- Ordean A, Chisamore BC. Clinical presentation and management of neonatal abstinence syndrome: An update. *Res Rep Neonatol* 2014;4:75-86. [www.dovepress.com/clinical-presentation-and-management-of-neonatal-abstinence-syndrome-a-peer-reviewed-fulltext-article-RRN](http://www.dovepress.com/clinical-presentation-and-management-of-neonatal-abstinence-syndrome-a-peer-reviewed-fulltext-article-RRN) (consulté le 3 août 2017)
- Kocherlakota P. Neonatal abstinence syndrome. *Pediatrics* 2014;134(2):e547-61.
- Coyle MG, Ferguson A, Lagasse L, Oh W, Lester B. Diluted tincture of opium (DTO) and phenobarbital versus DTO alone for neonatal opiate withdrawal in term infants. *J Pediatr* 2002;140(5):561-4.
- Ruwanpathirana R, Abdel-Latif ME, Burns L et coll. Prematurity reduces the severity and need for treatment of neonatal abstinence syndrome. *Acta Paediatr* 2015;104(5):e188-94.
- Hudak ML, Tan RC; Committee on Drugs; Committee on Fetus and Newborn. American Academy of Pediatrics. Neonatal drug withdrawal. *Pediatrics* 2012;129(2):e540-60.
- Newnam KM. The right tool at the right time: Examining the evidence surrounding measurement of neonatal abstinence syndrome. *Adv Neonatal Care* 2014;14(3):181-6.
- Finnegan LP, Kron RE, Connaughton JF, Emich JP. Assessment and treatment of abstinence in the infant of the drug-dependent mother. *Int J Clin Pharmacol Biopharm* 1975;12(1-2):19-32.
- Asti L, Magers JS, Keels E, Wispe J, McClelland RE. A quality improvement project to reduce length of stay for neonatal abstinence syndrome. *Pediatrics* 2015;135(6):e1494-500.
- D'Apolito K, Finnegan LP. Assessing Signs and Symptoms of Neonatal Abstinence Using the Finnegan Scoring Tool: An Inter-observer Reliability Program. 2<sup>e</sup> éd. Nashville, TN: NeoAdvances, 2010.

24. Pulat K. The legality of drug-testing procedures for pregnant women. *Virtual Mentor* 2008;10(1):41–4.
25. Levy S, Siqueira LM, Ammerman SD et coll.; Committee on Substance Abuse. Testing for drugs of abuse in children and adolescents. *Pediatrics* 2014;133(6):e1798–e1807.
26. Gibbs J, Newson T, Williams J, Davidson DC. Naloxone hazard in infant of opioid abuser. *Lancet* 1989;2(8655):159–60.
27. McKnight S, Coe H, Davies G et coll. Rooming-in for infants at risk of neonatal abstinence syndrome. *Am J Perinatol* 2016;33(5):495–501.
28. MacMillan KDL, Rendon CP, Verma K, Riblet N, Washer DB, Volpe Holmes A. Association of rooming-in with outcomes for neonatal abstinence syndrome: A systematic review and meta-analysis. *JAMA Pediatr* 2018 [Diffusion en ligne avant l'impression]. doi:10.1001/jamapediatrics.2017.5195.
29. Holmes AV, Atwood EC, Whalen B et coll. Rooming-in to treat neonatal abstinence syndrome: Improved family-centered care at lower cost. *Pediatrics* 2016;137(6):e20152929.
30. Hodgson ZG, Abrahams RR. A rooming-in program to mitigate the need to treat for opiate withdrawal in the newborn. *J Obstet Gynaecol Can* 2012;34(5):475–81.
31. Jansson LM, Velez M, Harrow C. The opioid-exposed newborn: Assessment and pharmacologic management. *J Opioid Manag* 2009;5(1):47–55.
32. Abdel-Latif ME, Pinner J, Clews S, Cooke F, Lui K, Oei J. Effects of breast milk on the severity and outcome of neonatal abstinence syndrome among infants of drug-dependent mothers. *Pediatrics* 2006;117(6):e1163–9.
33. Wachman EM, Byun J, Philipp BL. Breastfeeding rates among mothers of infants with neonatal abstinence syndrome. *Breastfeed Med* 2010;5(4):159–64.
34. Maguire DJ, Rowe MA, Spring H, Elliott AF. Patterns of disruptive feeding behaviors in infants with neonatal abstinence syndrome. *Adv Neonatal Care* 2015;15(6):429–39; quiz E1–2.
35. LaGasse LL, Messenger D, Lester BM et coll. Prenatal drug exposure and maternal and infant feeding behaviour. *Arch Dis Child Fetal Neonatal Ed* 2003;88(5):F391–9.
36. Murphy-Oikonen J, Brownlee K, Montelpare W, Gerlach K. The experiences of NICU nurses in caring for infants with neonatal abstinence syndrome. *Neonatal Netw* 2010;29(5):307–13.
37. MacMullen NJ, Dulski LA, Blobaum P. Evidence-based interventions for neonatal abstinence syndrome. *Pediatr Nurs* 2014;40(4):165–72, 203.
38. Bagley SM, Wachman EM, Holland E, Brogly SB. Review of the assessment and management of neonatal abstinence syndrome. *Addict Sci Clin Pract* 2014;9(1):19.
39. Kraft WK, Adeniyi-Jones SC, Chervoneva I et coll. Buprenorphine for the treatment of the neonatal abstinence syndrome. *N Engl J Med* 2017;376(24):2341–8.
40. Kraft WK, Stover MW, Davis JM. Neonatal abstinence syndrome: Pharmacologic strategies for the mother and infant. *Semin Perinatol* 2016;40(3):203–12.
41. Streetz VN, Gildon BL, Thompson DF. Role of clonidine in neonatal abstinence syndrome: A systematic review. *Ann Pharmacother* 2016;50(4):301–10.
42. Smirk CL, Bowman E, Doyle LW, Kamlin CO. How long should infants at risk of drug withdrawal be monitored after birth? *J Paediatr Child Health* 2014;50(5):352–5.
43. Provincial Council for Maternal and Child Health. Neonatal Abstinence Syndrome (NAS) Clinical Practice Guidelines. July 19, 2011 (revised March 30, 2012). <https://pqnc-documents.s3.amazonaws.com/nas/nasresources/NASGuidelines.pdf> (consulté le 3 août 2017)
44. Smirk CL, Bowman E, Doyle LW, Kamlin O. Home-based detoxification for neonatal abstinence syndrome reduces length of hospital admission without prolonging treatment. *Acta Paediatr* 2014;103(6):601–4.
45. McQueen K, Murphy-Oikonen J. Neonatal abstinence syndrome. *N Engl J Med* 2016;375(25):2468–79.
46. Backes CH, Backes CR, Gardner D, Nankervis CA, Giannone PJ, Cordero L. Neonatal abstinence syndrome: transitioning methadone-treated infants from an inpatient to an outpatient setting. *J Perinatol* 2012;32(6):425–30.
47. Marcellus L, Loutit T, Cross S. A national survey of the nursing care of infants with prenatal substance exposure in Canadian NICUS. *Adv Neonatal Care* 2015;15(5):336–44.
48. Johnston A, Metayer J, Robinson E. Management of Neonatal Opioid Withdrawal. Section 4 of Treatment of Opioid Dependence in Pregnancy: Vermont Guidelines. Vermont Children's Hospital at Fletcher Allen Health Care, 2010. [http://contentmanager.med.uvm.edu/docs/default-source/vchip-documents/vchip\\_Sneonatal\\_guidelines.pdf?sfvrsn=2](http://contentmanager.med.uvm.edu/docs/default-source/vchip-documents/vchip_Sneonatal_guidelines.pdf?sfvrsn=2) (consulté le 3 août 2017)

#### COMITÉ D'ÉTUDE DU FŒTUS ET DU NOUVEAU-NÉ DE LA SCP

**Membres :** Mireille Guillot MD, Leonora Hendson MD, Ann Jefferies MD (présidente sortante), Thierry Lacaze-Masmonteil MD (président), Brigitte Lemyre MD, Michael Narvey MD, Leigh Anne Newhook MD (représentante du conseil), Vibhuti Shah MD

**Représentants :** Radha Chari MD, La Société des obstétriciens et gynécologues du Canada; Jane Cummings MD, comité d'étude du fœtus et du nouveau-né, American Academy of Pediatrics; William Ehman MD, Le Collège des médecins de famille du Canada; Roxanne Laforge inf., Canadian Perinatal Programs Coalition; Chantal Nelson Ph. D., Agence de la santé publique du Canada; Eugene H Ng MD, section de la médecine néonatale et périnatale de la SCP; Doris Sawatzky-Dickson inf., Association canadienne des infirmières et infirmiers en néonatalogie

**Auteurs principaux :** Thierry Lacaze-Masmonteil MD, Pat O'Flaherty M. Éd., M. Sc. inf., IA (cat. spéc.)
